# Supplementary material for: Preparation, characterization and application of MgFe2O4/Cu nanocomposite as a new magnetic catalyst for one-pot regioselective synthesis of β-thiol-1,4-disubstituted-1,2,3-triazoles
Source: Royal Society of Chemistry journal article supplement (doi:10.1039/d1ra01588e), 2021-01-01
Supplement: d1ra01588e1.pdf [file d1ra01588e1.pdf]

## Supplementary Information

### Preparation, characterization and application of MgFe<sub>2</sub>O<sub>4</sub>/Cu nanocomposite as a new magnetic catalyst for one-pot regioselective synthesis of $\beta$ -thiol-1,4-disubstituted-1,2,3-triazoles

Ronak Eisavi\* and Kazhal Naseri

Department of Chemistry, Payame Noor Universtiy, PO BOX 19395-3697, Tehran, Iran

Email: roonak.isavi@gmail.com

FT-IR, <sup>1</sup>H NMR and <sup>13</sup>C NMR spectra of  $\beta$ -Thiol-1,4-disubstituted-1,2,3-triazoles (**1-11**)b and FT-IR spectrum of 2-azido-2-phenylethanethiol intermediate are presented as following:

#### 2-Phenyl-2-(4-phenyl-1H-1,2,3-triazol-1-yl)ethane-1-thiol (**1b**)

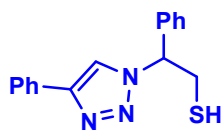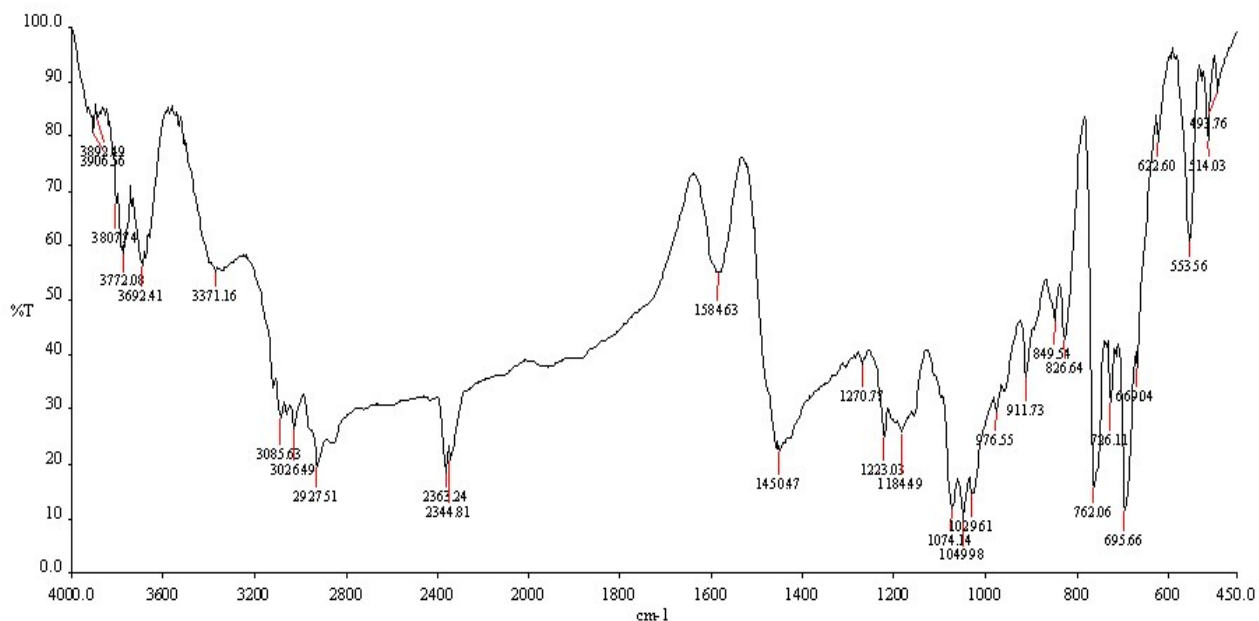

Figure S1. FT-IR Spectrum of 2-phenyl-2-(4-phenyl-1H-1,2,3-triazol-1-yl)ethane-1-thiol (**1b**)

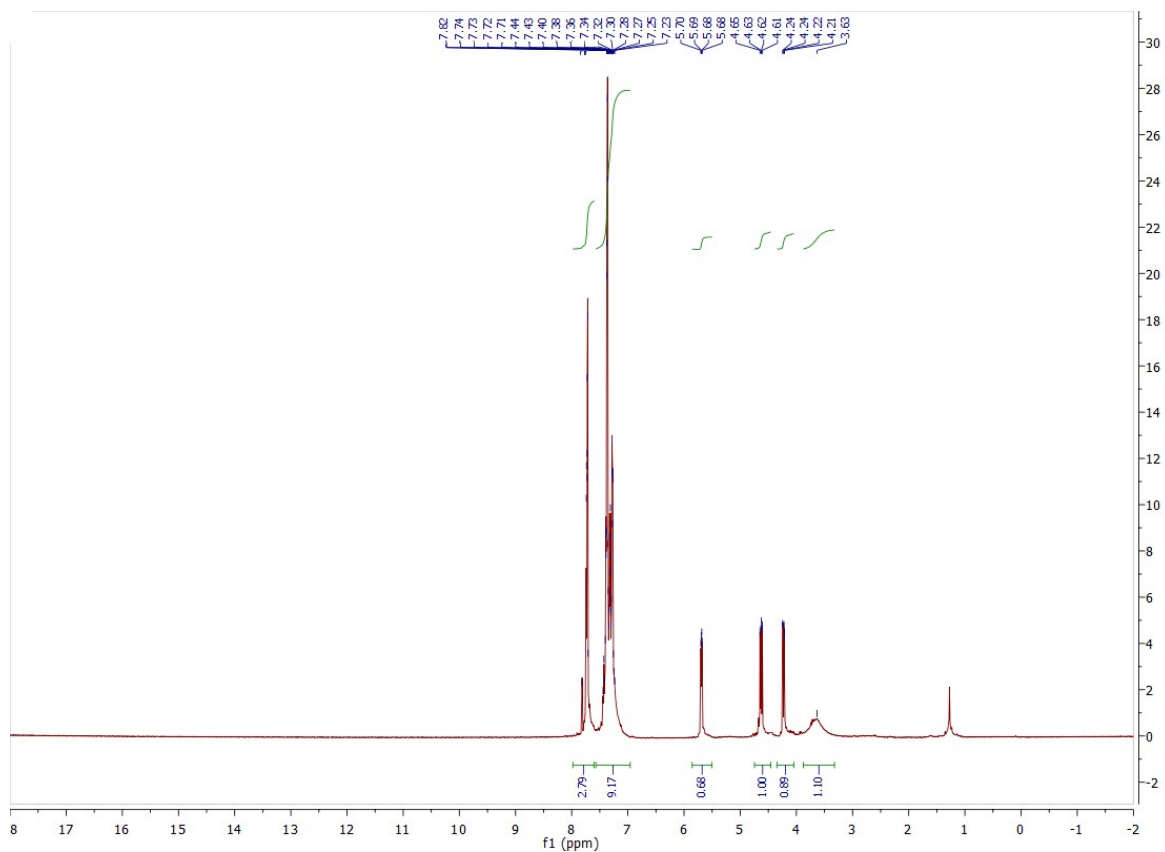

Figure S2. <sup>1</sup>H NMR Spectrum of 2-phenyl-2-(4-phenyl-1H-1,2,3-triazol-1-yl)ethane-1-thiol (**1b**)

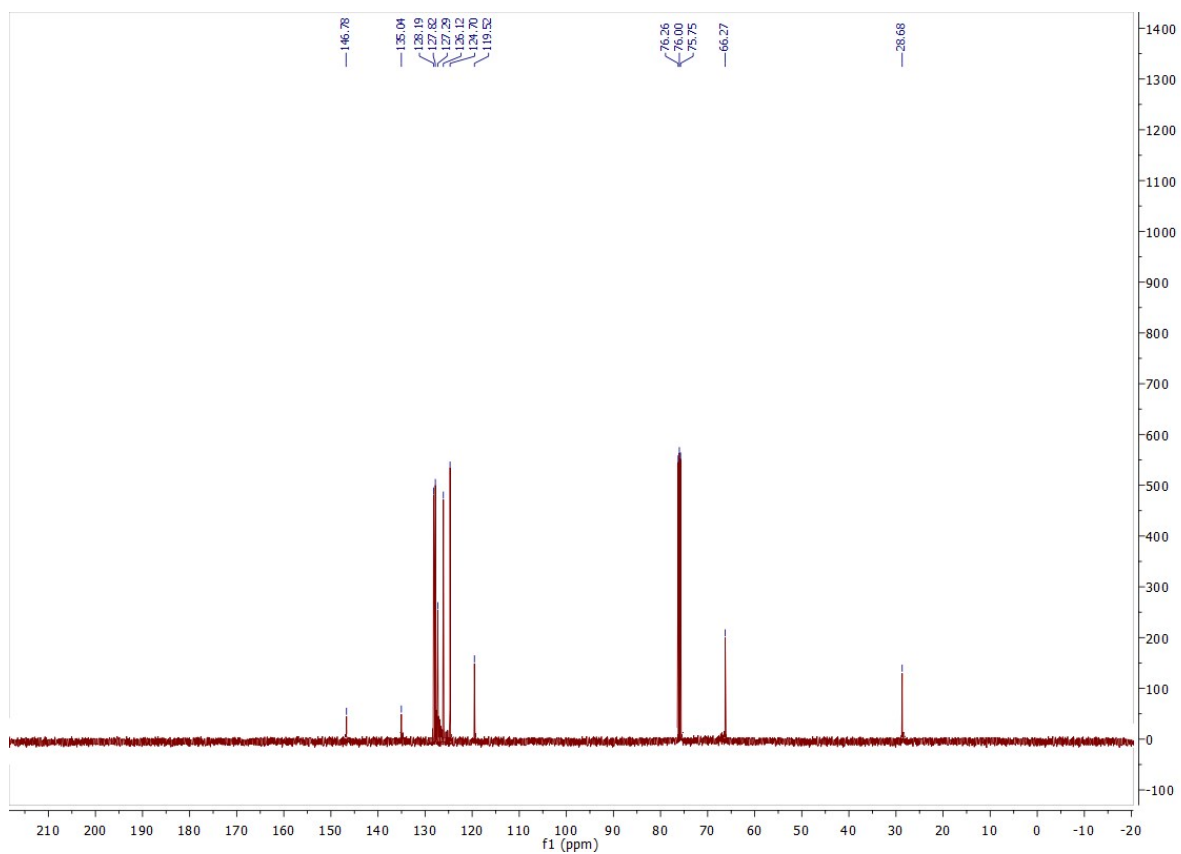

Figure S3. <sup>13</sup>C NMR Spectrum of 2-phenyl-2-(4-phenyl-1H-1,2,3-triazol-1-yl)ethane-1-thiol (**1b**)  
1-Phenoxy-3-(4-phenyl-1H-1,2,3-triazol-1-yl)propane-2-thiol (**2b**)

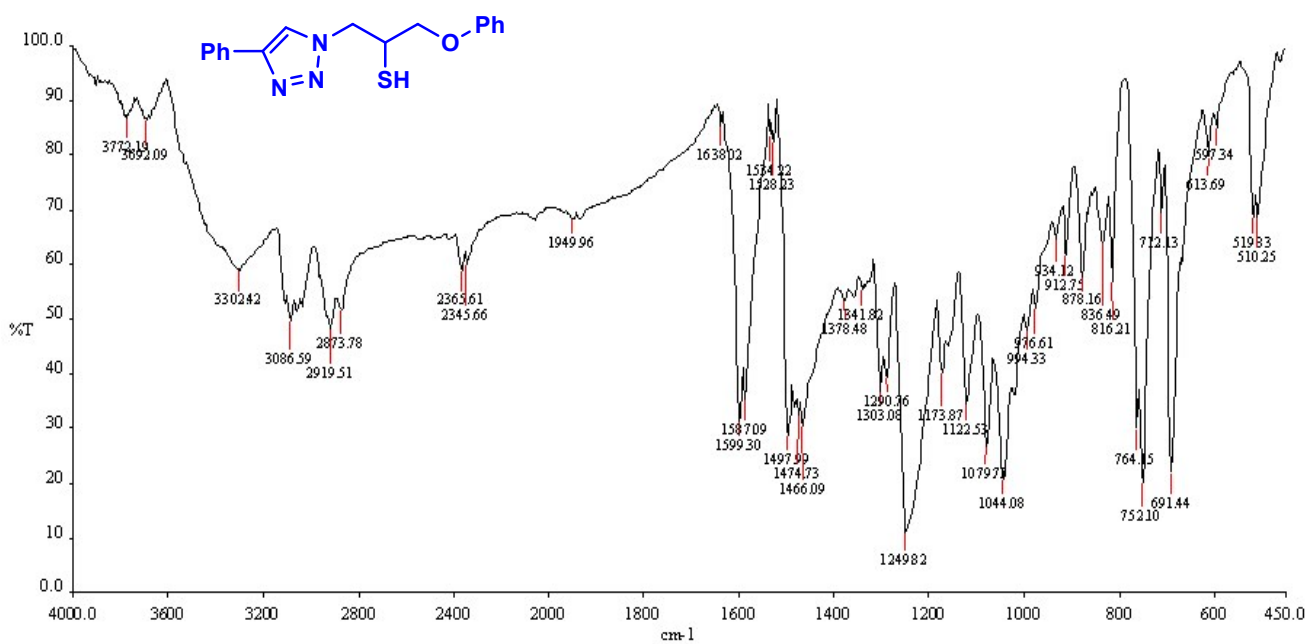

Figure S4. FT-IR Spectrum of 1-phenoxy-3-(4-phenyl-1H-1,2,3-triazol-1-yl)propane-2-thiol (2b)

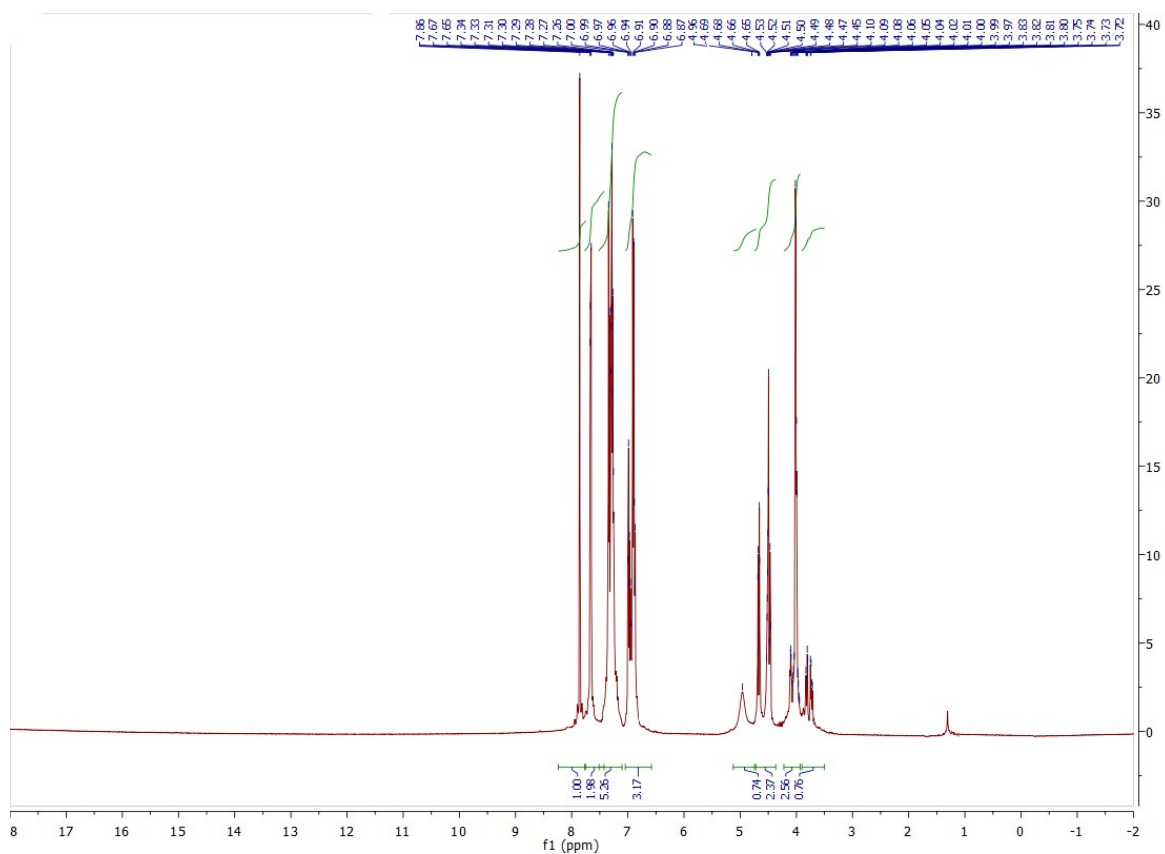

Figure S5. <sup>1</sup>H NMR Spectrum of 1-phenoxy-3-(4-phenyl-1H-1,2,3-triazol-1-yl)propane-2-thiol (2b)

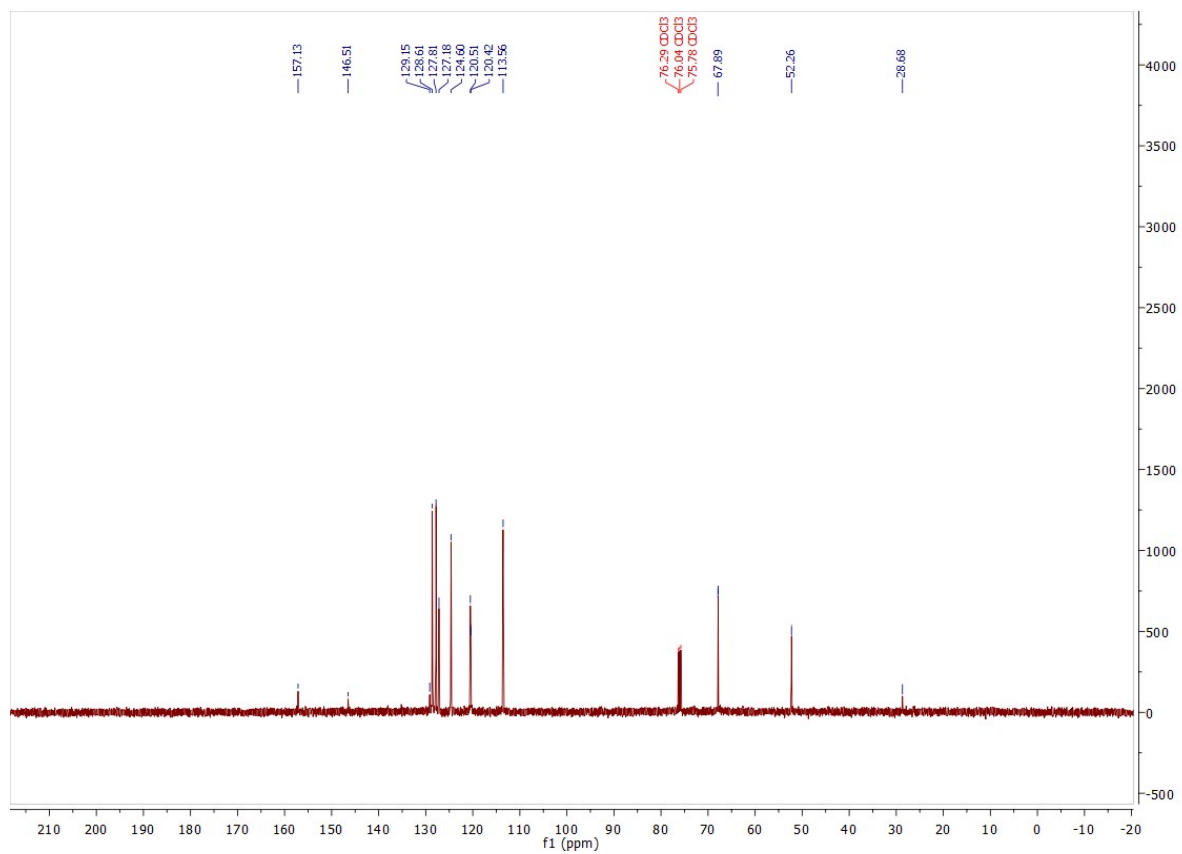

Figure S6. <sup>13</sup>C NMR Spectrum of 1-phenoxy-3-(4-phenyl-1H-1,2,3-triazol-1-yl)propane-2-thiol (2b)

*1-Chloro-3-(5-phenyl-1H-1,2,3-triazol-1-yl)propane-2-thiol (3b)*

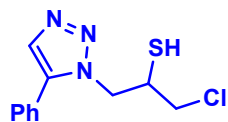

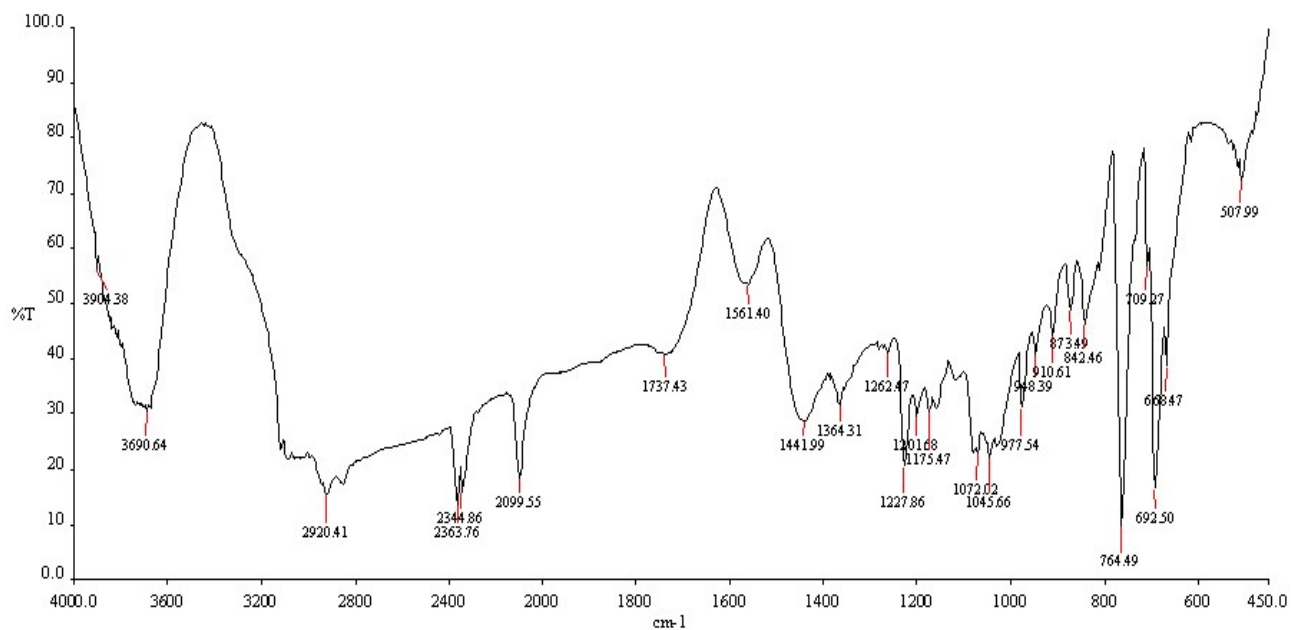

Figure S7. FT-IR Spectrum of 1-chloro-3-(5-phenyl-1H-1,2,3-triazol-1-yl)propane-2-thiol (3b)

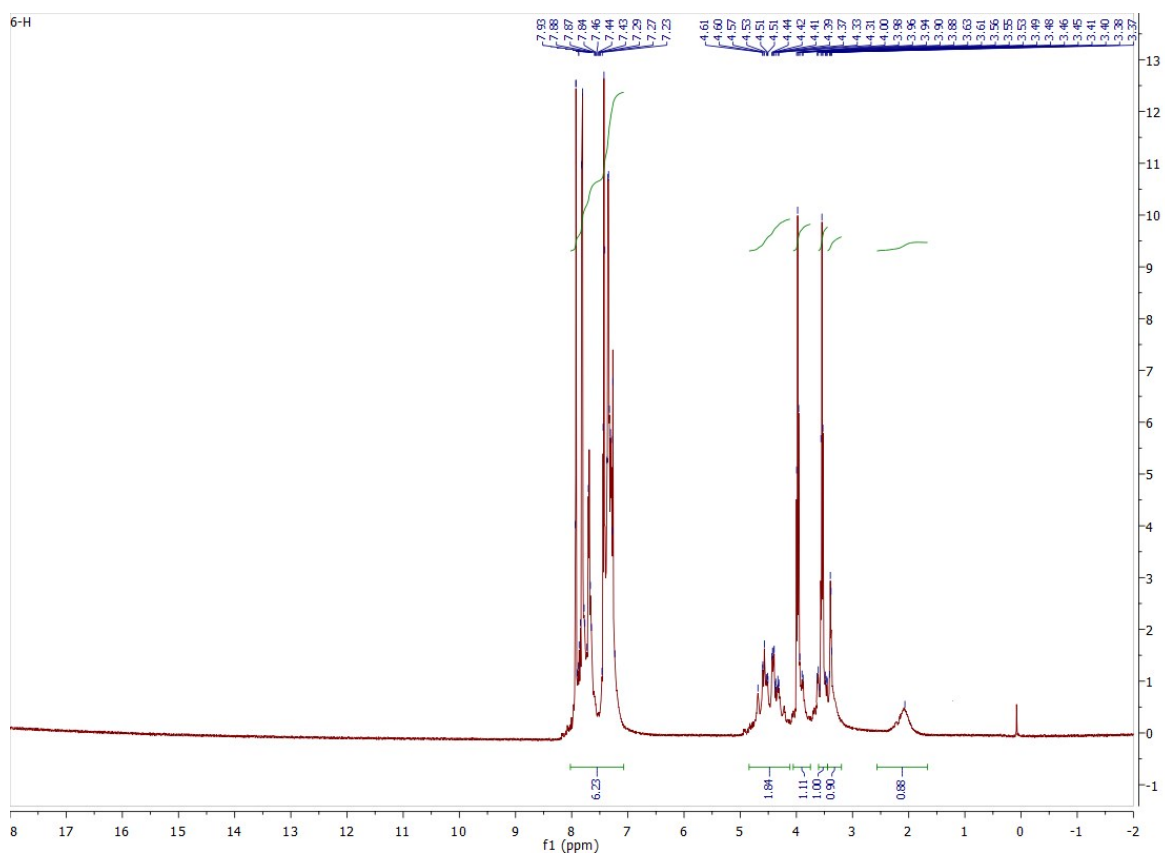

Figure S8. <sup>1</sup>H NMR Spectrum of 1-chloro-3-(5-phenyl-1H-1,2,3-triazol-1-yl)propane-2-thiol (3b)

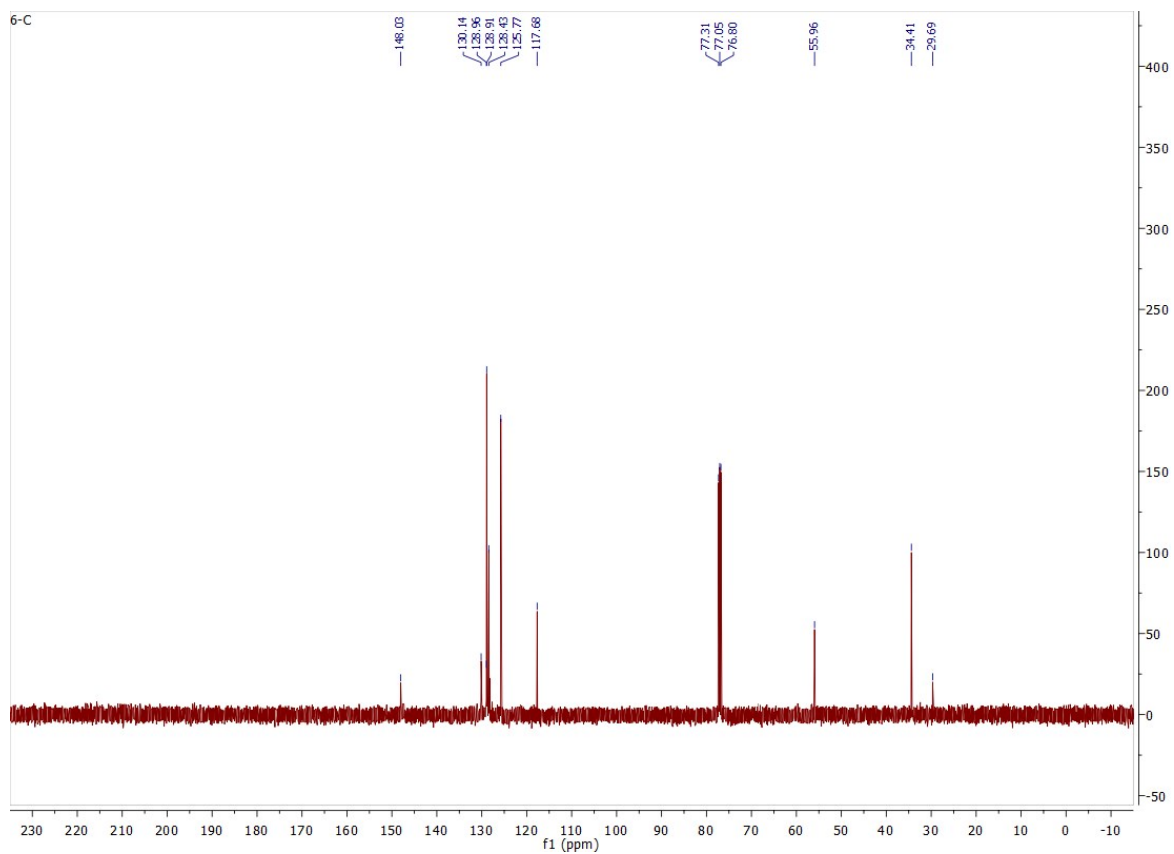

Figure S9.  $^{13}\text{C}$  NMR Spectrum of 1-chloro-3-(5-phenyl-1H-1,2,3-triazol-1-yl)propane-2-thiol (3b)

*1-(4-Phenyl-1H-1,2,3-triazol-1-yl)butane-2-thiol (4b)*

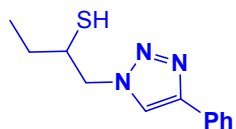

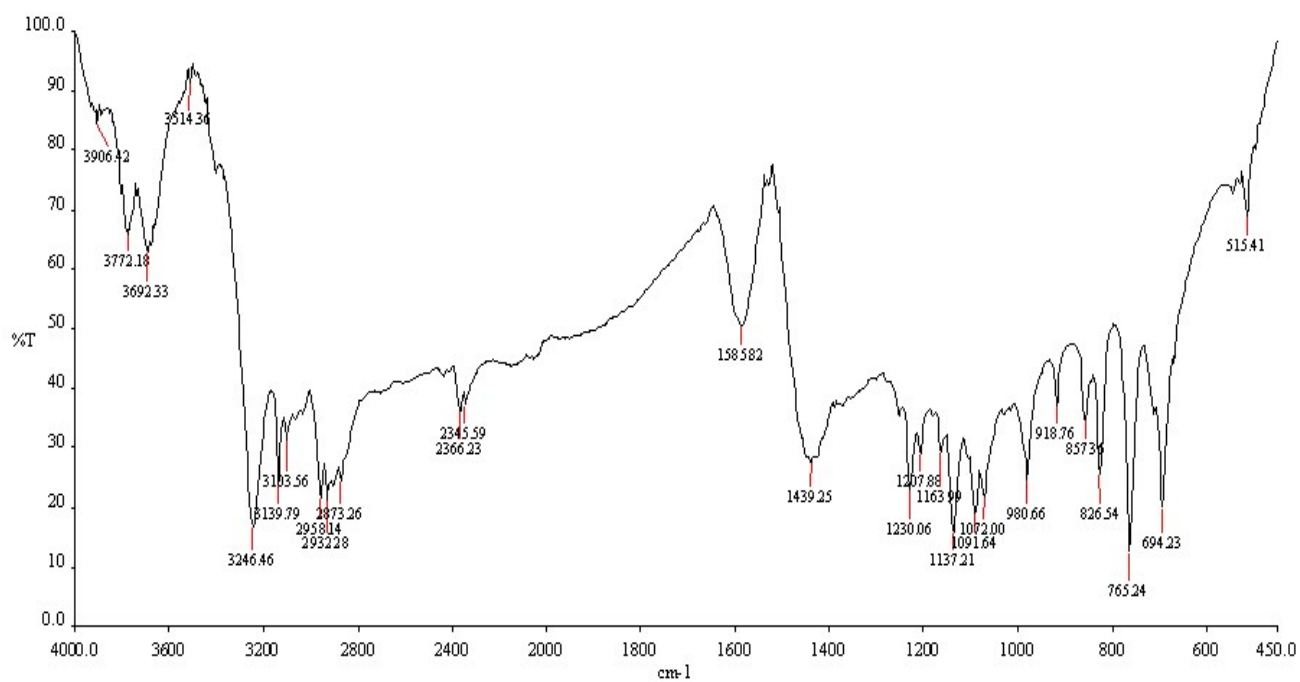

Figure S10. FT-IR Spectrum of 1-(4-phenyl-1*H*-1,2,3-triazol-1-yl)butane-2-thiol (4b)

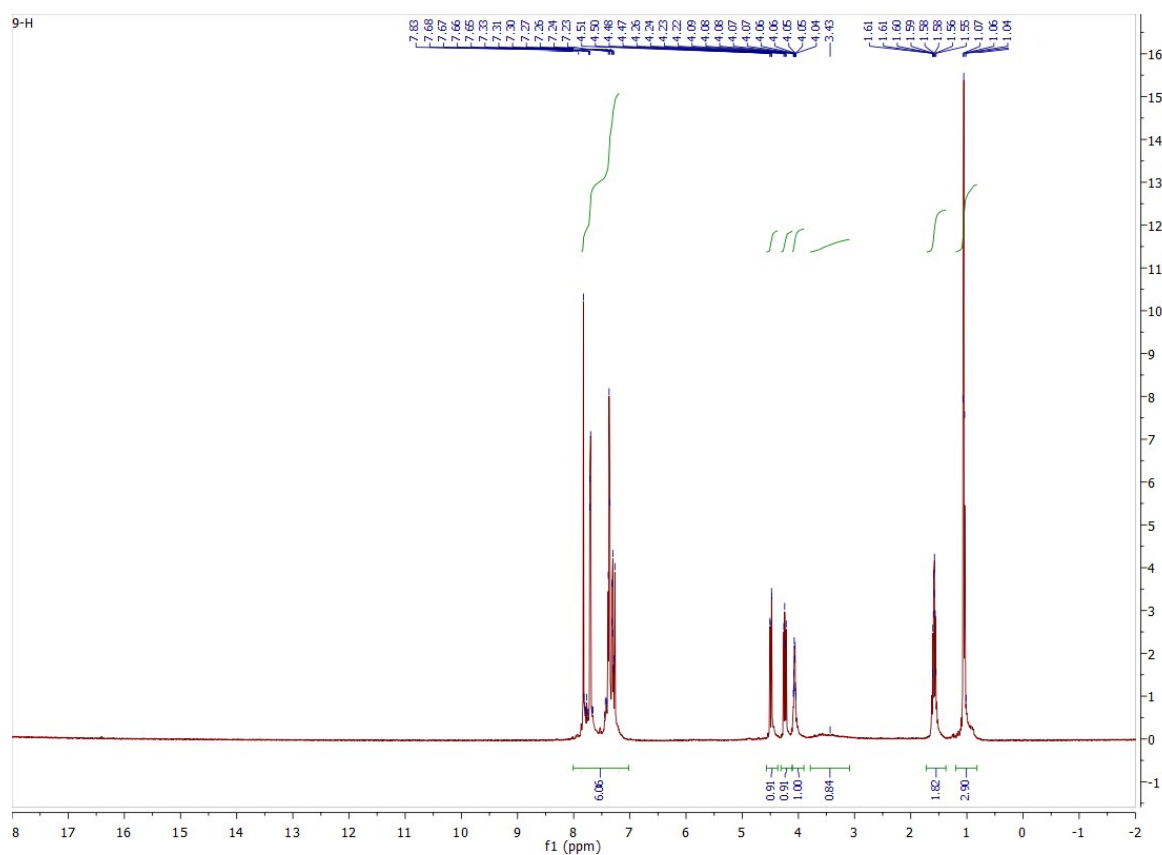

Figure S11. <sup>1</sup>H NMR Spectrum of 1-(4-phenyl-1*H*-1,2,3-triazol-1-yl)butane-2-thiol (4b)

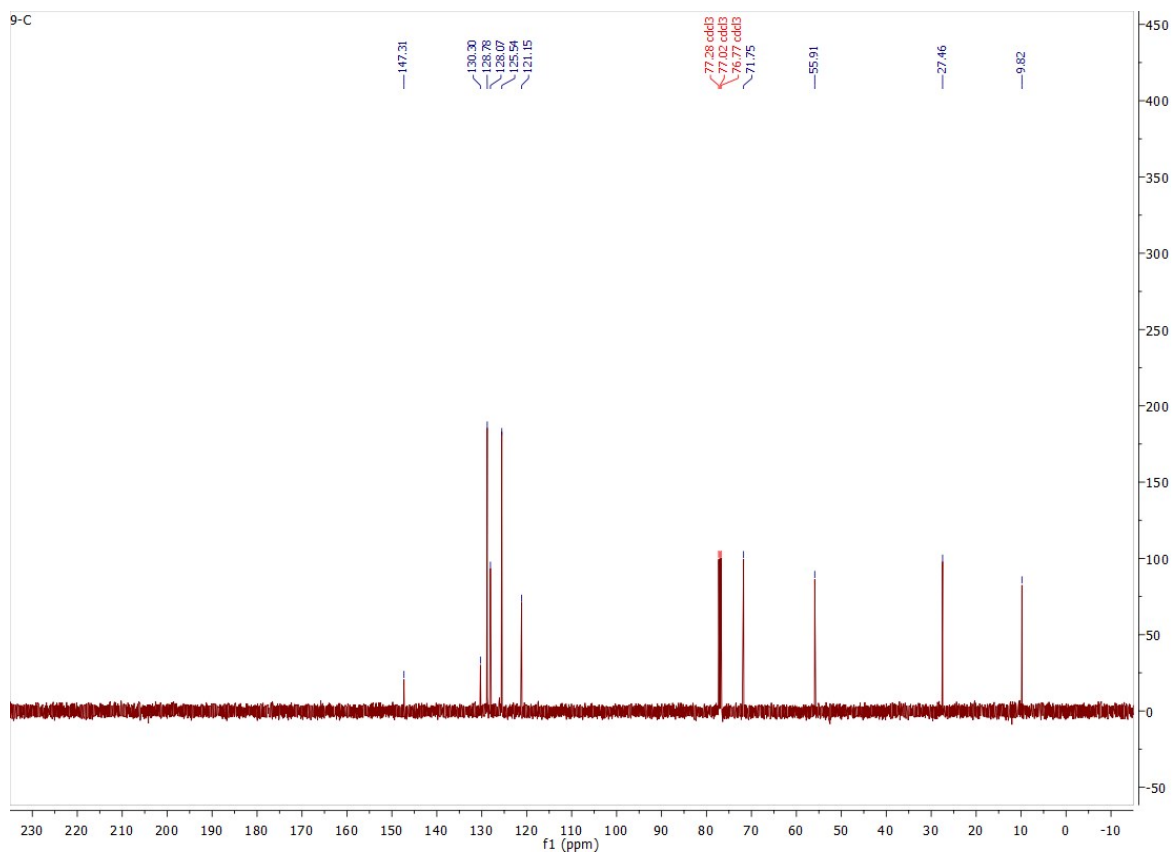

Figure S12.  $^{13}\text{C}$  NMR Spectrum of 1-(4-phenyl-1*H*-1,2,3-triazol-1-yl)butane-2-thiol (**4b**)

*1-Isopropoxy-3-(4-phenyl-1*H*-1,2,3-triazol-1-yl)propane-2-thiol (5b)*

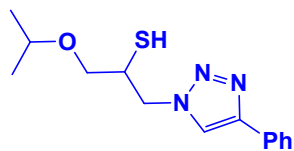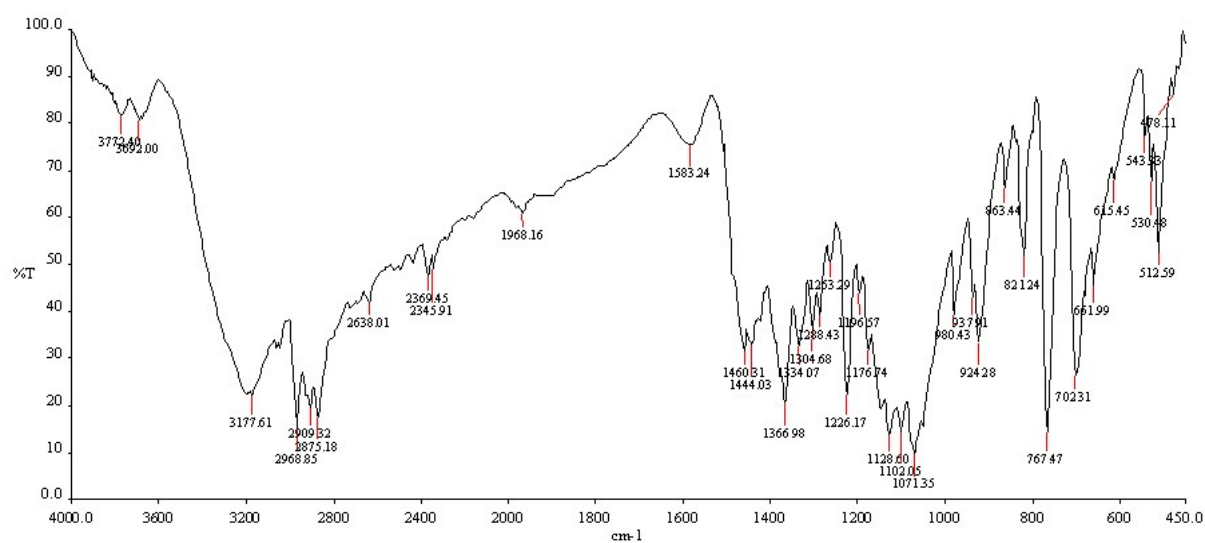

Figure S13. FT-IR Spectrum of 1-isopropoxy-3-(4-phenyl-1*H*-1,2,3-triazol-1-yl)propane-2-thiol (**5b**)



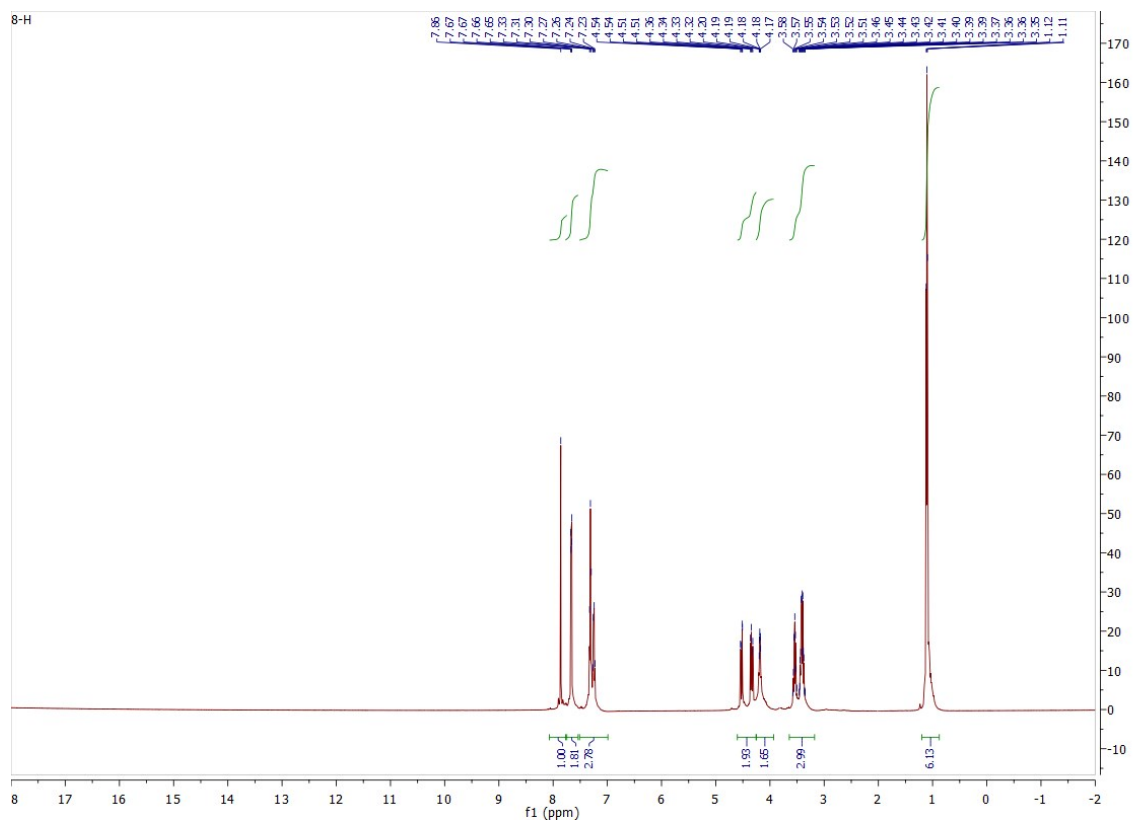

Figure S14.  $^1\text{H}$  NMR Spectrum of 1-isopropoxy-3-(4-phenyl-1*H*-1,2,3-triazol-1-yl)propane-2-thiol (5b)

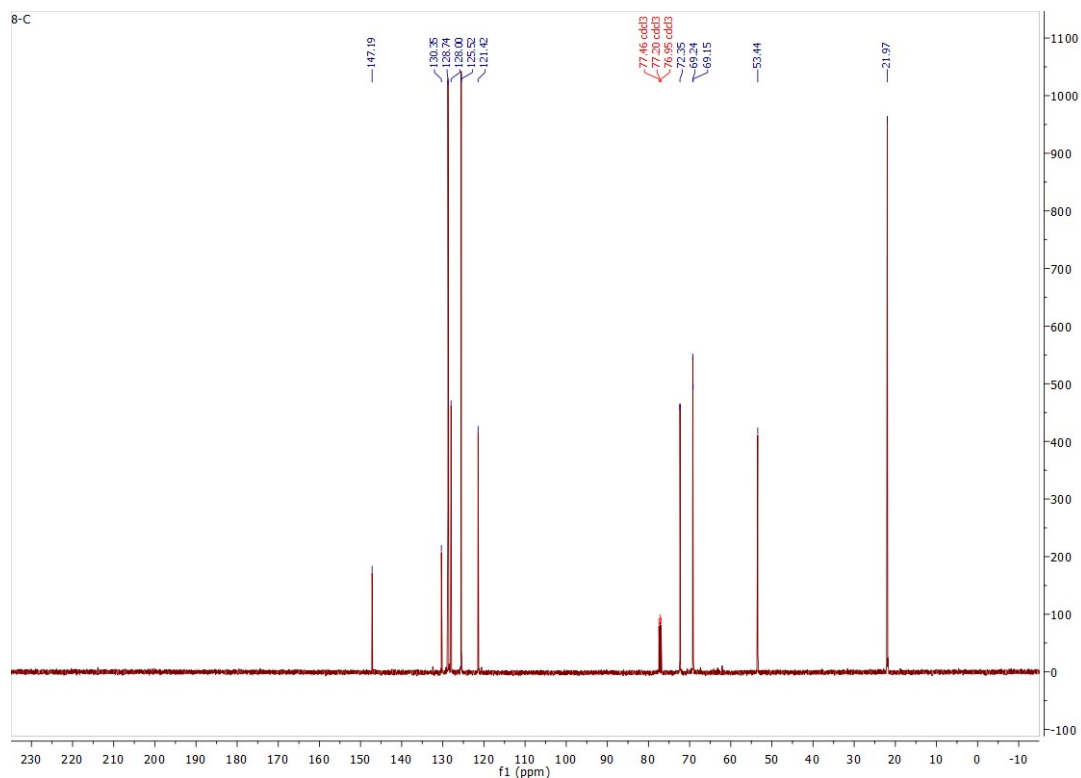

Figure S15.  $^{13}\text{C}$  NMR Spectrum of 1-isopropoxy-3-(4-phenyl-1*H*-1,2,3-triazol-1-yl)propane-2-thiol (5b)

**2-(4-Phenyl-1H-1,2,3-triazol-1-yl)cyclohexane-1-thiol (6b)**

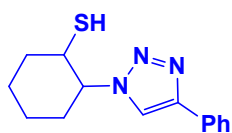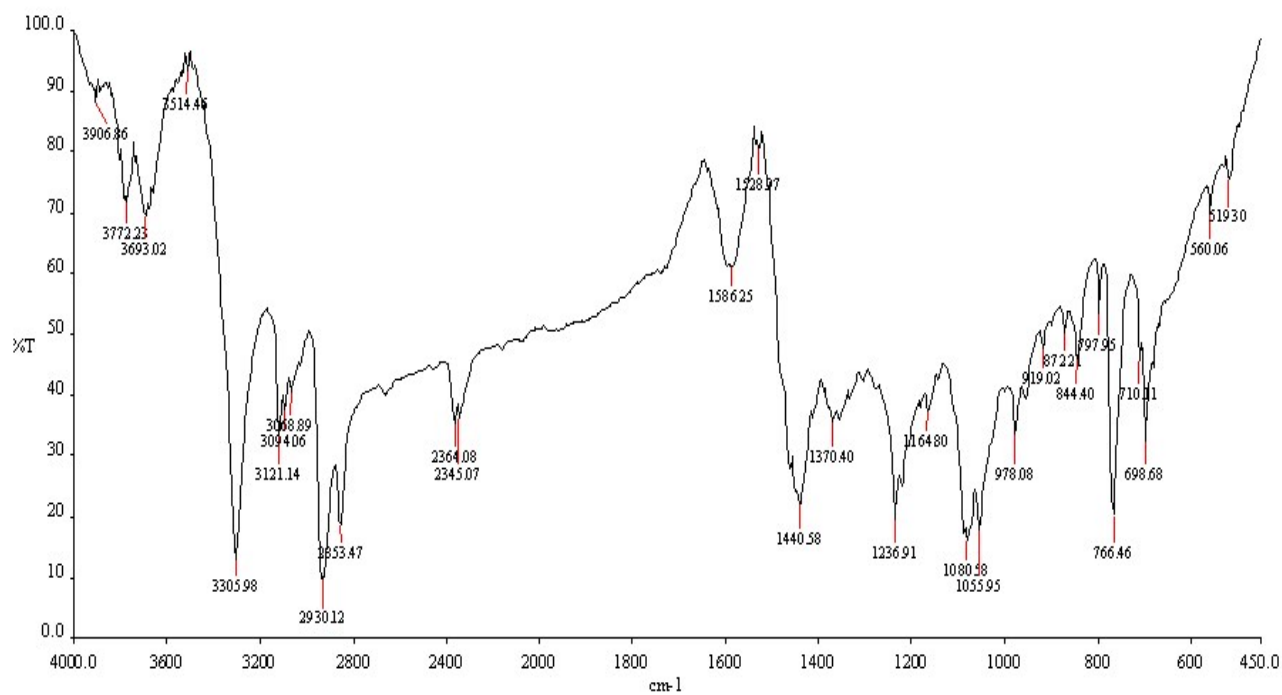

**Figure S16. FT-IR Spectrum of 2-(4-phenyl-1H-1,2,3-triazol-1-yl)cyclohexane-1-thiol (6b)**

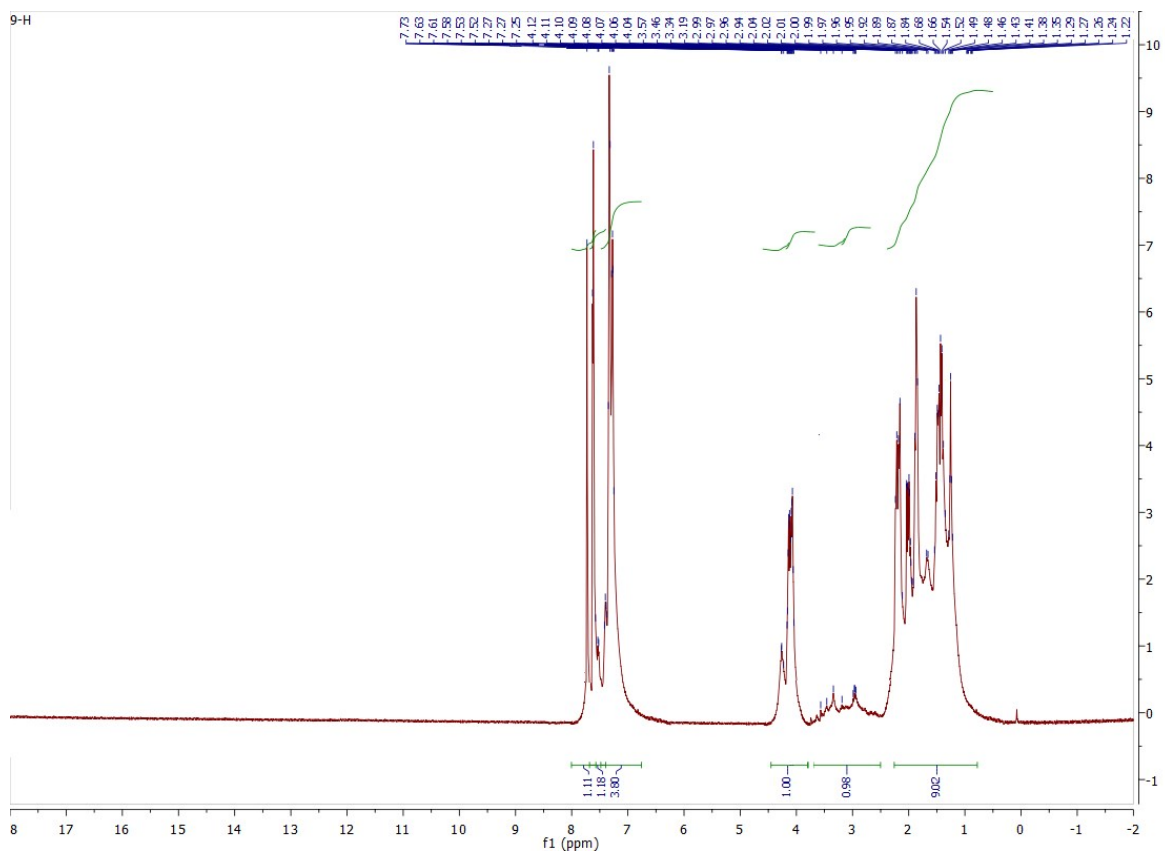

Figure S17. <sup>1</sup>H NMR Spectrum of 2-(4-phenyl-1*H*-1,2,3-triazol-1-yl)cyclohexane-1-thiol (**6b**)

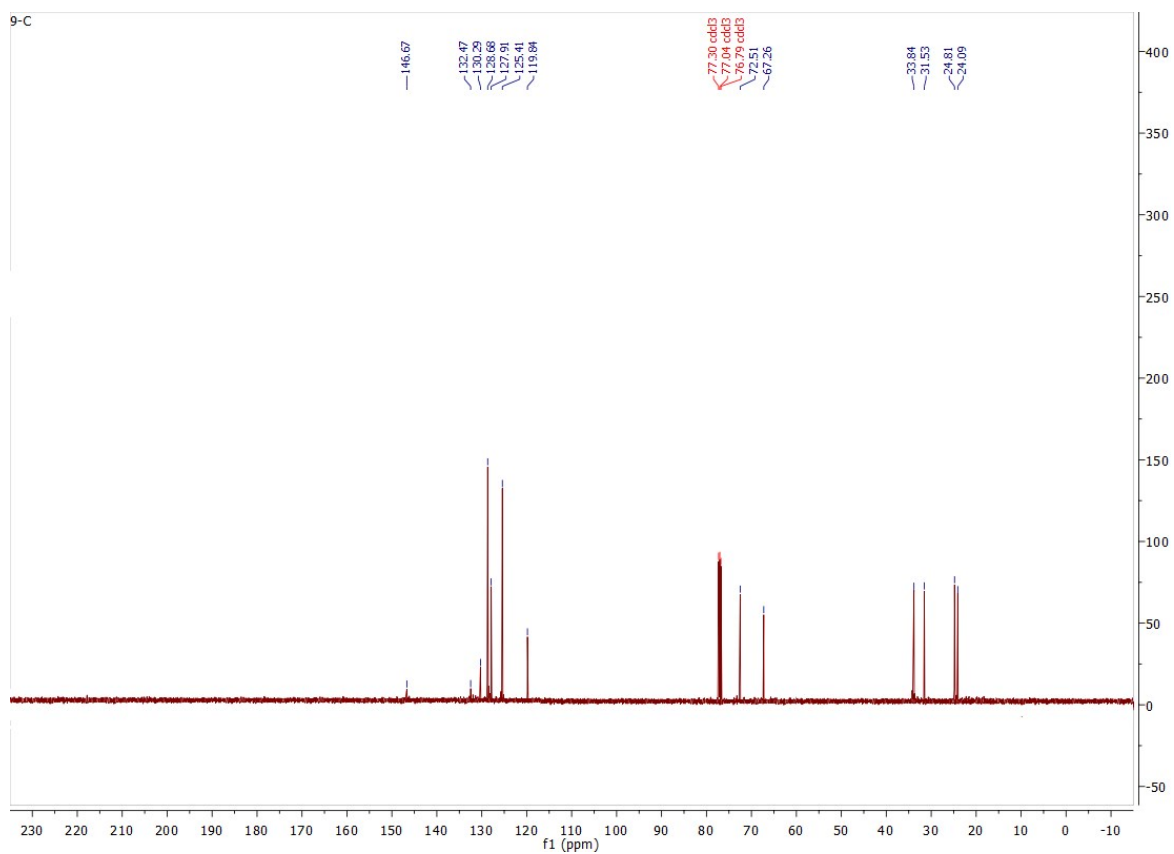

Figure S18. <sup>13</sup>C NMR Spectrum of 2-(4-phenyl-1*H*-1,2,3-triazol-1-yl)cyclohexane-1-thiol (**6b**)

**1-(Allyloxy)-3-(4-phenyl-1H-1,2,3-triazol-1-yl)propane-2-thiol (7b)**

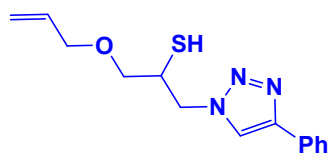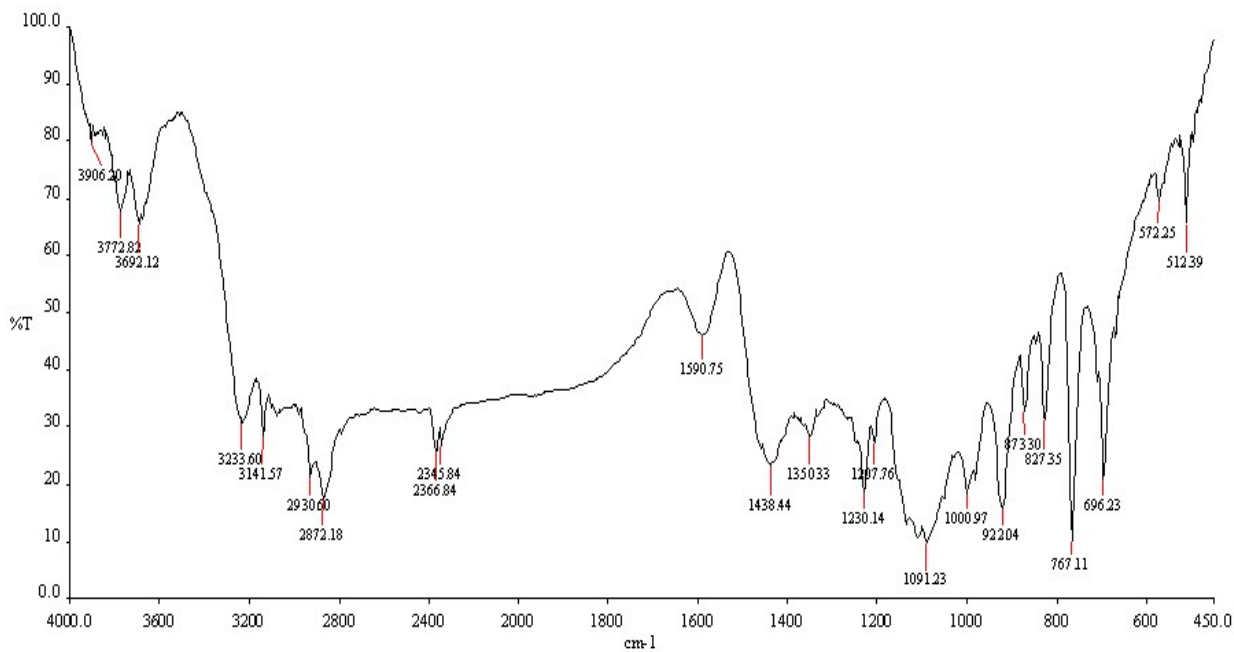

**Figure S19. FT-IR Spectrum of 1-(allyloxy)-3-(4-phenyl-1H-1,2,3-triazol-1-yl)propane-2-thiol (7b)**

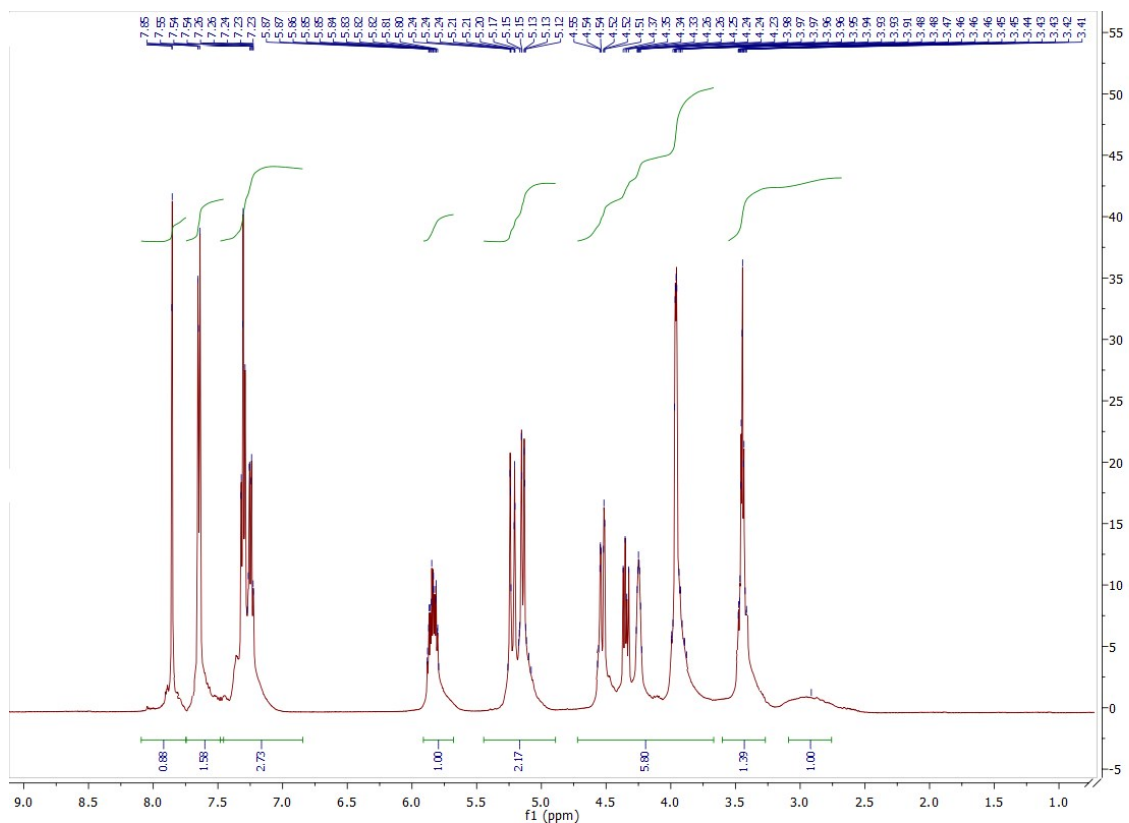

Figure S20. <sup>1</sup>H NMR Spectrum of 1-(allyloxy)-3-(4-phenyl-1*H*-1,2,3-triazol-1-yl)propane-2-thiol (7b)

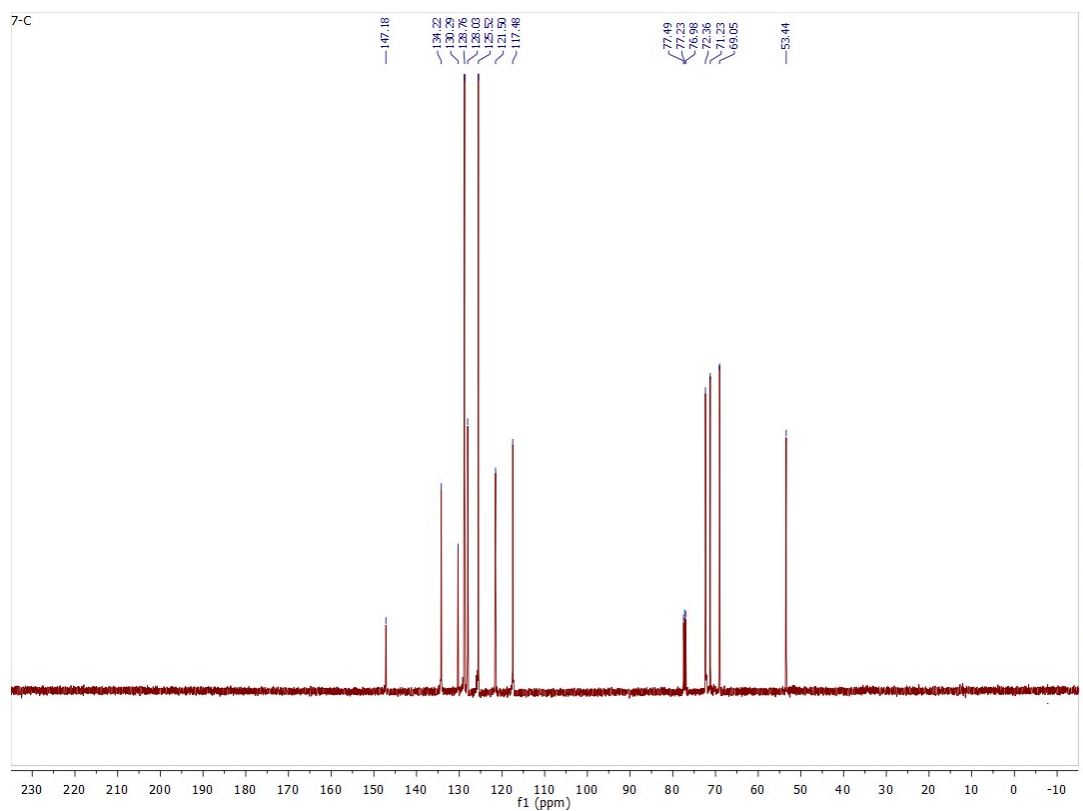

Figure S21. <sup>13</sup>C NMR Spectrum of 1-(allyloxy)-3-(4-phenyl-1*H*-1,2,3-triazol-1-yl)propane-2-thiol (7b)

**2-Mercapto-3-(4-phenyl-1H-1,2,3-triazol-1-yl)propyl methacrylate (8b)**

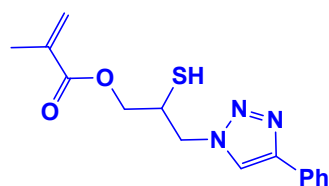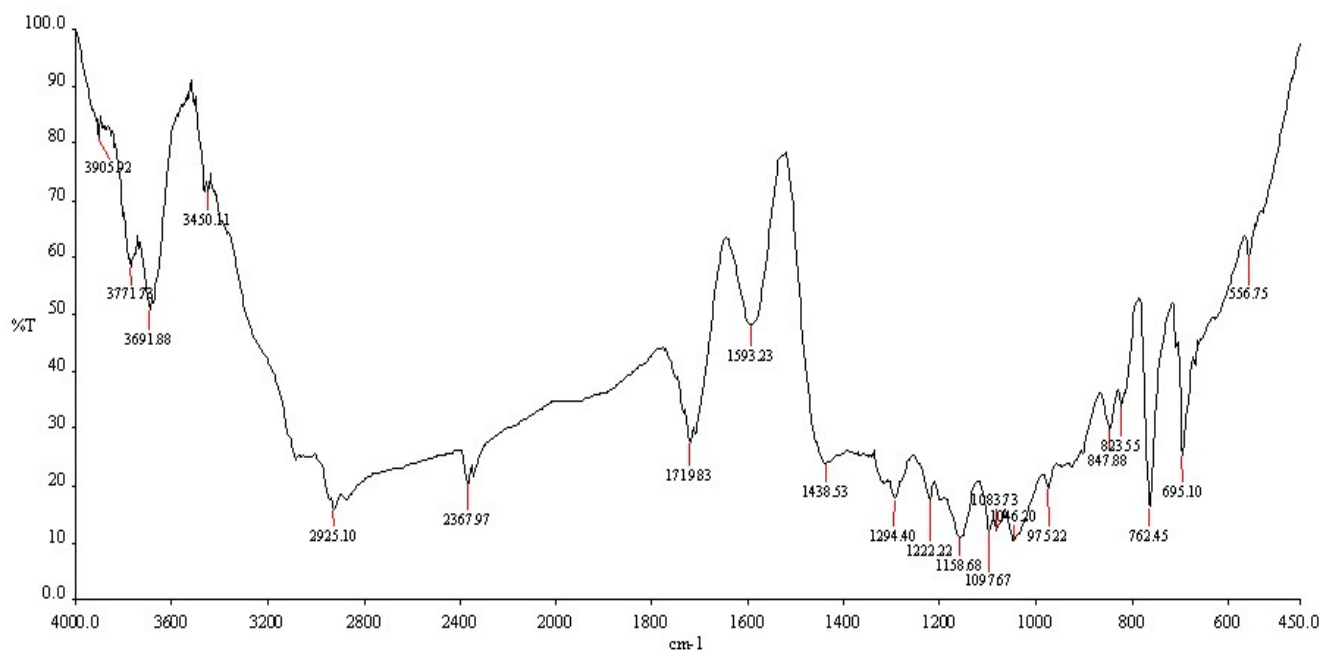

**Figure S22. FT-IR Spectrum of 2-mercapto-3-(4-phenyl-1H-1,2,3-triazol-1-yl)propyl methacrylate (8b)**

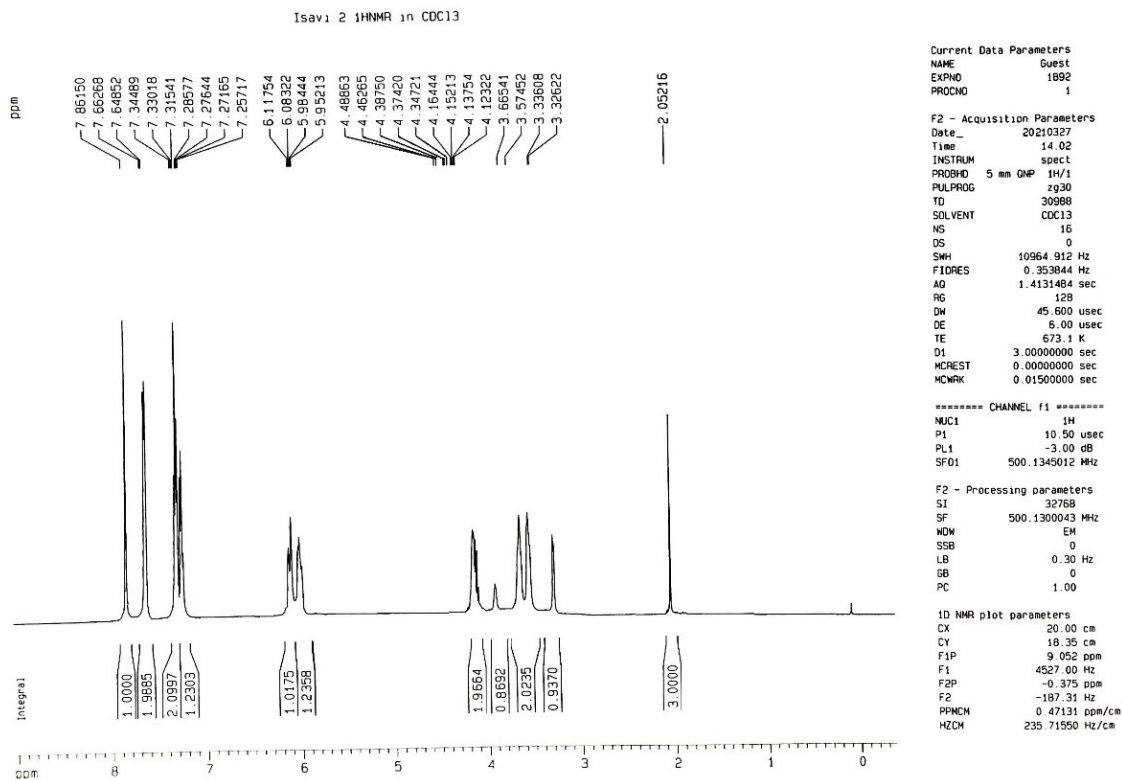

**Figure S23. <sup>1</sup>H NMR Spectrum of 2-mercapto-3-(4-phenyl-1H-1,2,3-triazol-1-yl)propyl methacrylate (8b)**

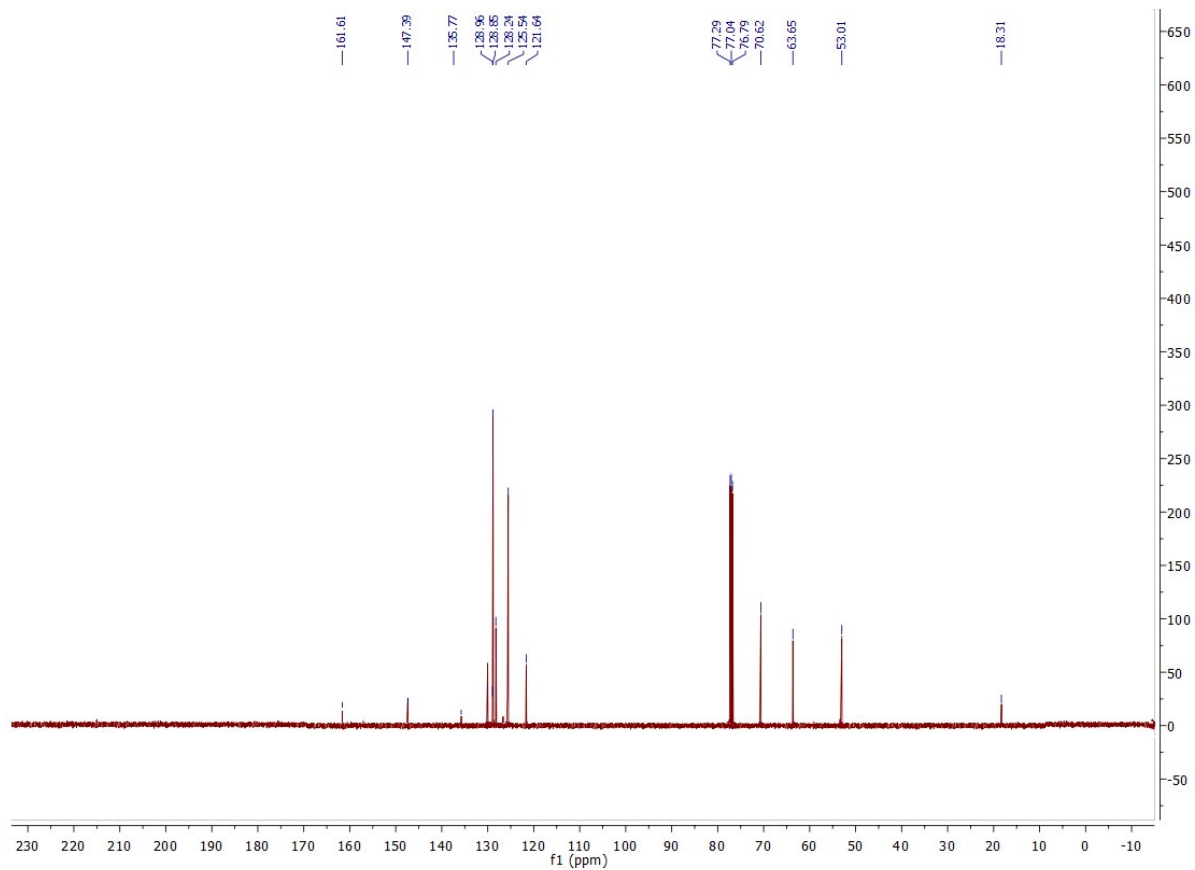

Figure S24.  $^{13}\text{C}$  NMR Spectrum of 2-mercapto-3-(4-phenyl-1H-1,2,3-triazol-1-yl)propyl methacrylate (8b)

*2-(4-Cyclohexyl-1H-1,2,3-triazol-1-yl)-2-phenylethane-1-thiol (9b)*

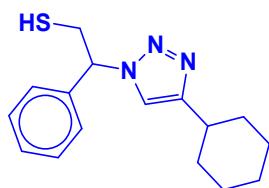



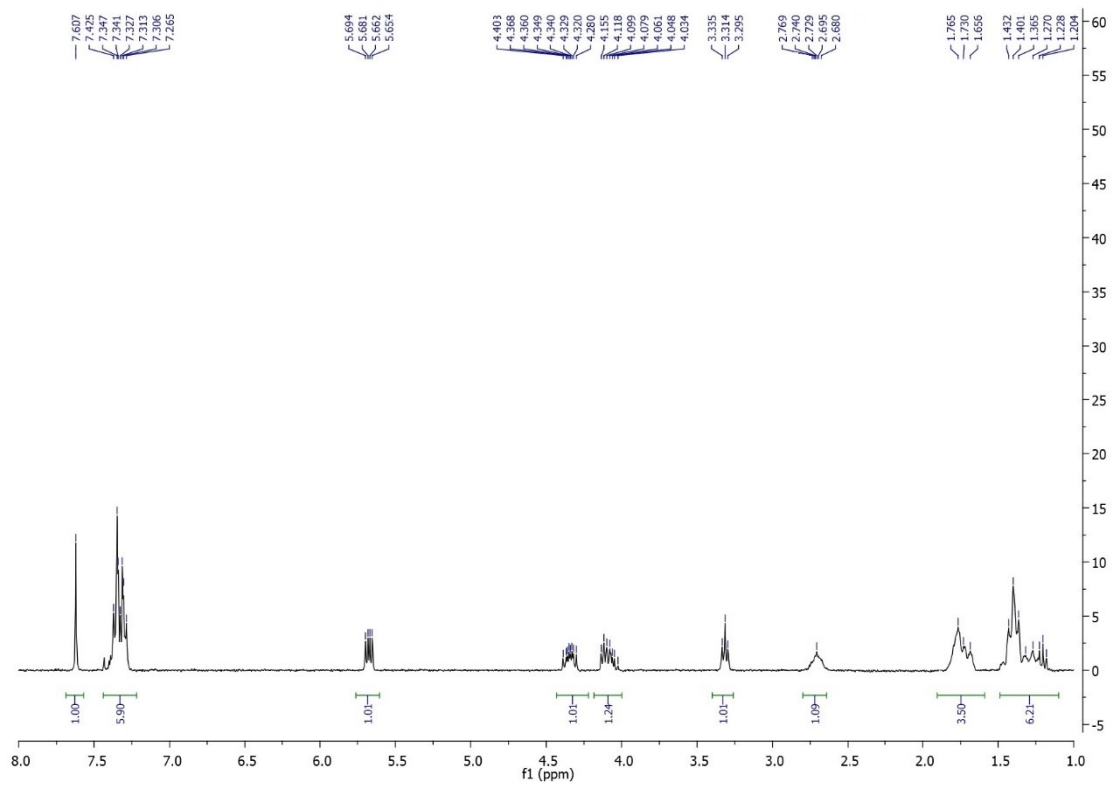

**Figure S25.**  $^1\text{H}$  NMR Spectrum of 2-(4-cyclohexyl-1*H*-1,2,3-triazol-1-yl)-2-phenylethane-1-thiol (**9b**)

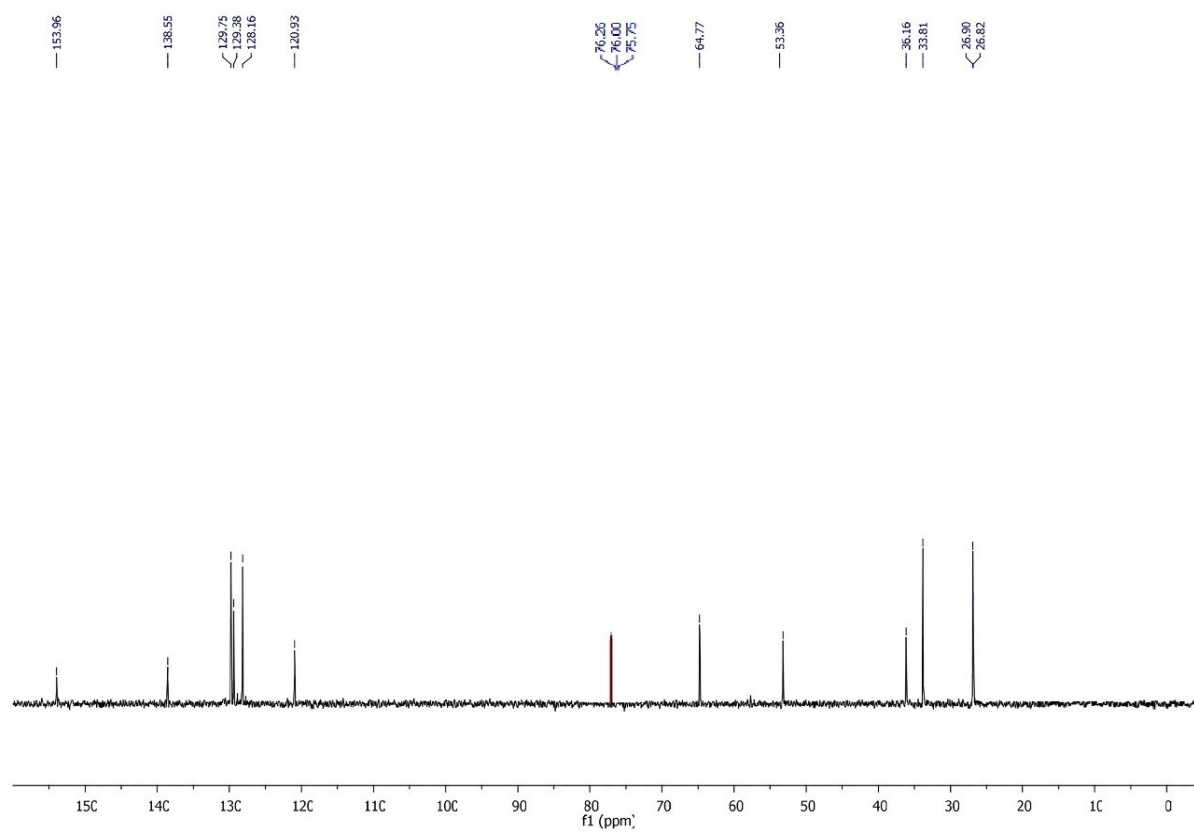

**Figure S26.**  $^{13}\text{C}$  NMR Spectrum of 2-(4-cyclohexyl-1H-1,2,3-triazol-1-yl)-2-phenylethane-1-thiol (9b)

*(1-(2-Mercapto-1-phenylethyl)-1H-1,2,3-triazol-4-yl)methanol (10b)*

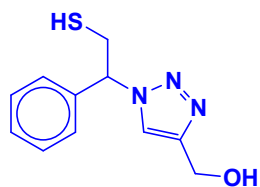

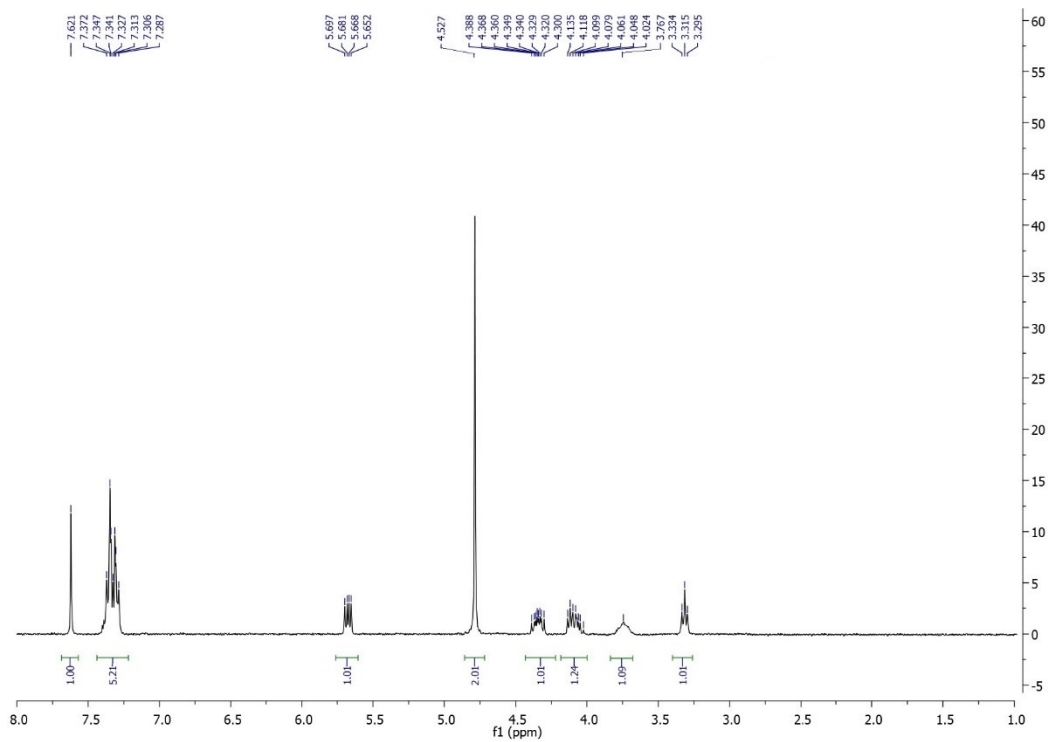

Figure S27.  $^1\text{H}$  NMR Spectrum of (1-(2-mercapto-1-phenylethyl)-1*H*-1,2,3-triazol-4-yl)methanol (10b)

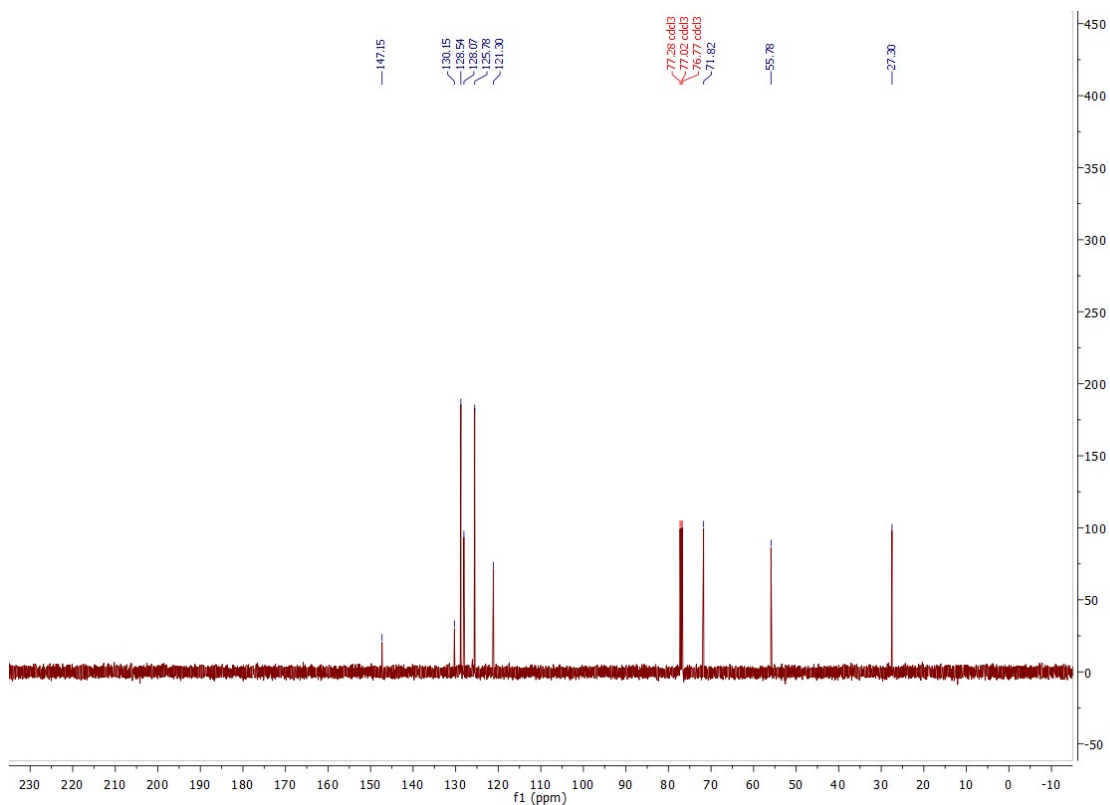

Figure S28.  $^{13}\text{C}$  NMR Spectrum of (1-(2-mercapto-1-phenylethyl)-1*H*-1,2,3-triazol-4-yl)methanol (10b)

2-(4-(4-Methoxyphenyl)-1H-1,2,3-triazol-1-yl)-2-phenylethane-1-thiol (11b)

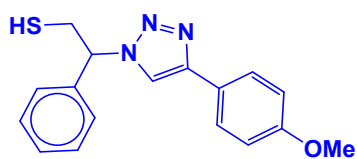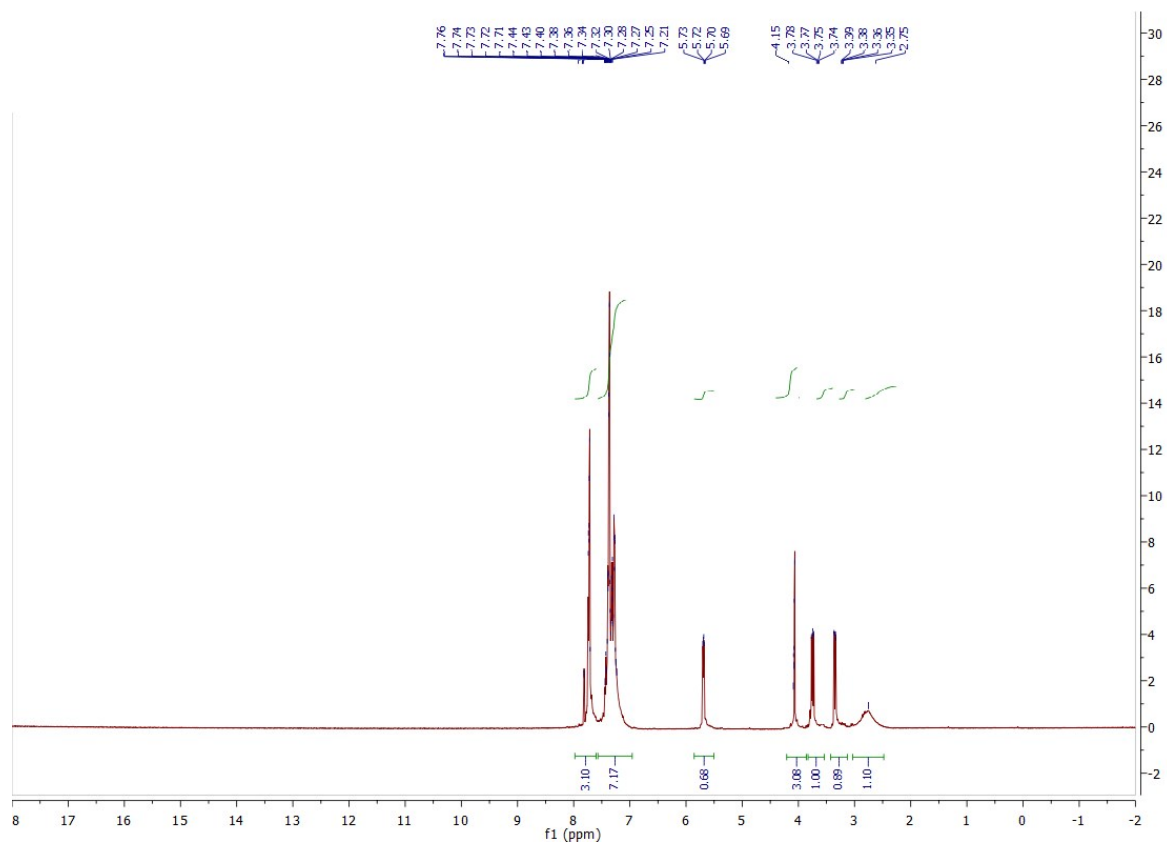

Figure S29. <sup>1</sup>H NMR Spectrum of 2-(4-(4-methoxyphenyl)-1H-1,2,3-triazol-1-yl)-2-phenylethane-1-thiol (11b)

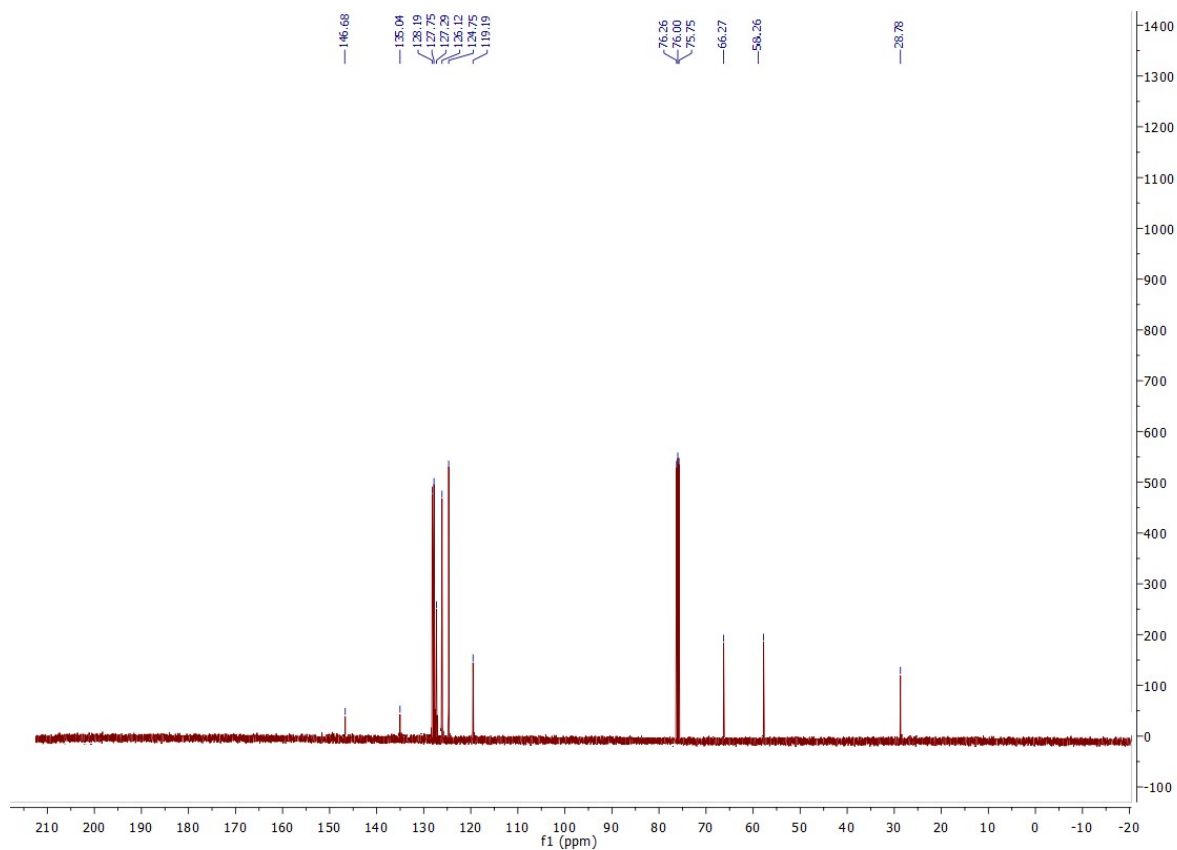

Figure S30.  $^{13}\text{C}$  NMR Spectrum of 2-(4-(4-methoxyphenyl)-1H-1,2,3-triazol-1-yl)-2-phenylethane-1-thiol (11b)

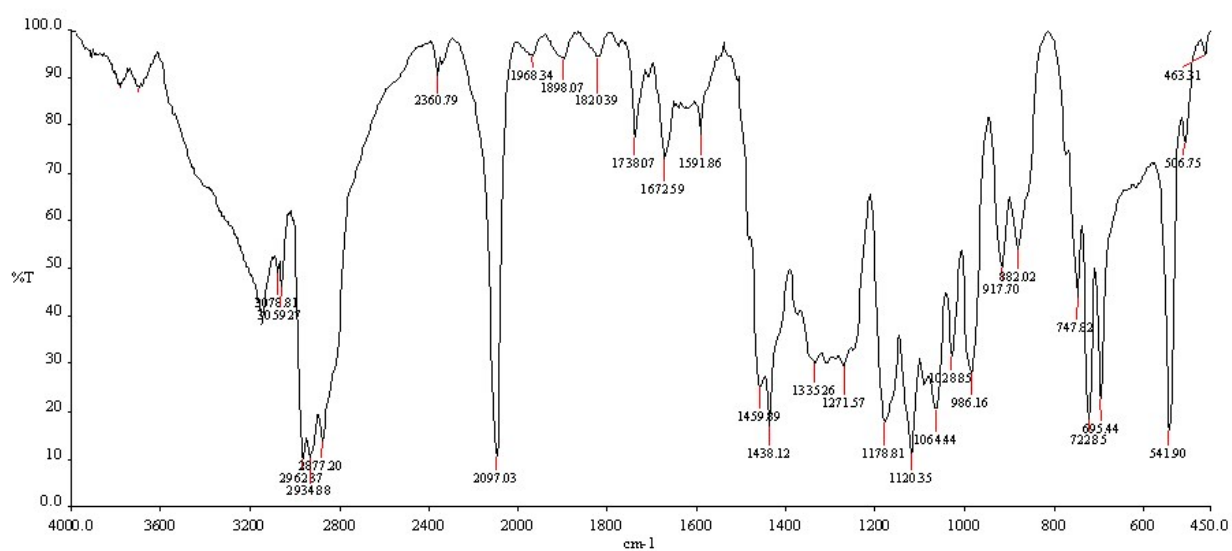

Figure S31. FT-IR Spectrum of 2-azido-2-phenylethanethiol intermediate
